19 **Abstract**

20 **Objective:** In late January 2020, the Japanese government carried out three evacuations  
21 by aircraft from Wuhan, China, to avoid further cases of coronavirus disease 2019  
22 (COVID-19) among Wuhan’s Japanese residents. Evacuation by aircraft may be an  
23 effective countermeasure against outbreaks of infectious diseases, but evidence of its  
24 effect is scarce. This study estimated how many COVID-19 cases were prevented  
25 among the Japanese residents of Wuhan by the evacuation countermeasure.

26 **Results:** Eleven imported COVID-19 cases were reported on Feb 1 from among the  
27 total 566 evacuees who returned to Japan. In the case of no evacuations being made, the  
28 cumulative number of COVID-19 cases among Wuhan’s Japanese residents was  
29 estimated to reach 25 (95% CI [20, 29]) on Feb 8 and 34 (95% CI [28, 40]) on Feb  
30 15. A 1-week delay in the evacuation might be led to 14 additional cases and a 2-week  
31 delay to 23 additional cases. Evacuation by aircraft can contribute substantially to  
32 reducing the number of infected cases in the initial stage of the outbreak.

33

34 **Introduction**

35 Starting at the end of December 2019, Wuhan city in China reported an increasing  
36 number of cases of coronavirus disease 2019 (COVID-2019) infection [1, 2]. Japan's  
37 Ministry of Health, Labour and Welfare (MHLW) decided to deploy charter flights to  
38 evacuate Japanese residents of Wuhan over 3 consecutive days, on Jan 29, 30, and 31  
39 [3]. This marked the first time that the Japanese government has carried out evacuations  
40 as a countermeasure against an infectious disease outbreak. Evacuation by aircraft may  
41 be an effective countermeasure to reduce the number of infected cases during an  
42 outbreak, but there is little quantitative evidence of its effect. Thus, the main objective  
43 of this study was to elucidate the effect of such intervention quantitatively.

44

45 **Main text**

46 **Data sources**

47 For this modelling study, we used data on the number of COVID-19 cases confirmed in  
48 Hubei Province for the period Jan 10-19, 2020 from a report by Wu et al. [4] and for the  
49 period Jan 20-Feb 16, 2020 from the World Health Organization (WHO) situation  
50 reports [2]. We excluded data after Feb 17 due to a change in case definition.

51 We collected pharyngeal swab specimens to determine the number of

52 COVID-19 cases among the Japanese evacuees who returned on the chartered flights.

53 The 536 evacuees answered a questionnaire about their symptoms and contact history

54 and provided the pharyngeal swab specimens for PCR testing at that time.

55

## 56 **Model structure**

57 We applied the following

58 susceptible-exposed-moderate-asymptomatic-infectious-recovered (SEMAIR) model to

59 simulate the epidemic in Hubei Province:

$$\frac{dS}{dt} = -p \beta_0 S(t) (M(t) + A(t)) - \beta_0 S(t) I(t),$$

$$\frac{dE}{dt} = p \beta_0 S(t) (M(t) + A(t)) + \beta_0 S(t) I(t) - \sigma E(t),$$

$$\frac{dM}{dt} = \sigma E(t) - \epsilon M(t),$$

$$\frac{dA}{dt} = (1 - \delta) \epsilon M(t) - \gamma A(t),$$

$$\frac{dI}{dt} = \delta \epsilon M(t) - \gamma I(t),$$

$$\frac{dR}{dt} = \gamma A(t) + \gamma I(t).$$

60 We created the model based on the assumptions that a substantial proportion of patients

61 are asymptomatic or pauci-symptomatic (as suggested by the clinical characteristics of

62 COVID-19) [5–7] and that transmission may be possible in mild cases (which include

63 asymptomatic and pauci-symptomatic ones) as well as moderate cases) [5, 8, 9], but

64 only some cases become critically ill. Hence we additionally introduced “moderate”  
65 compartment  $M$  and “asymptomatic” compartment  $A$  into the standard  
66 susceptible-exposed-infectious-recovered (SEIR) model [10, 11] to create the  
67 abovementioned SEMAIR structure. The model structure is shown in Figure 1 and  
68 detailed description of each parameter is in Appendix.

69

70 (Figure 1)

71

72 In the early phase of an outbreak when it is not yet recognised as such, the  
73 diagnosis rate is considered to be small and not all cases are detectable [4, 12–14]. The  
74 diagnosis rate will increase over the course of a pandemic, so we introduce  
75 time-dependent function  $a(t)$  to represent each day’s ascertainment rate, which  
76 reflects people’s awareness of COVID-19. Here we assume that  $a(t)$  is a logarithmic  
77 growth curve and that the number of reported cases  $C(t)$  is given by

78 
$$C(t) = a(t) I(t) = \frac{1}{1 + \exp(-k(t - t_0 - D))} I(t).$$

79

80 In addition to the change in diagnosis rate over time, people pay more attention to  
81 prevention and start wearing masks and washing their hands more frequently as public

82 awareness increases. It is reported that such behavioural changes lower transmission

83 rate  $\beta_0$  and this effect is captured by

$$\beta(t) = \beta_0 r (1 - a(t)) = \beta^* (1 - a(t)),$$

84 where  $r$  is a proportionality constant and  $\beta^* = \beta_0 r$ .

85

## 86 **Results**

87 Parameter values were randomly generated based on the estimated parameter

88 values and their 95% CIs, and 10,000 numerical simulations were carried out to obtain

89 the upper and lower bounds for the total number of COVID-19 patients in Hubei

90 Province. The estimated parameter values are shown in Table 1.

91

92 (Table 1)

93

94 Estimated number of cases by SEMAIR model is shown in Figure 2. In lower

95 left small panels, the brown dots show the total number of COVID-19 cases and the

96 pink dots and shaded region show the 95% CI for Wuhan (612,475 [397,256,

97 827,695]) and Hubei Province (590,873 [487,794, 693,951]) as of Feb 16, 2020. The

98 estimated parameters were slightly different between the Wuhan population-based

99 analysis and the Hubei population-based analysis and the 95% CI was wider for the  
100 former than the latter, but the estimated total number of COVID-19 patients agreed well  
101 between them.

102 Incidence rates in the Wuhan and Hubei populations were estimated as  
103  $612,475/(1.1 \times 10^7)$  and  $590,873/(5.9 \times 10^7)$ , respectively, and the estimated  
104 numbers of cases [95% CI] among Japanese evacuees as of Feb 1 were 31 [20, 42]  
105 and 6 [5, 7], respectively, which give bounds for over- and underestimation of Japanese  
106 evacuee cases. The actual number of cases among Japanese evacuees was 11, which lies  
107 between these estimates. The incidence rate among Japanese evacuees was  $0.0195 =$   
108  $11/564$ . By applying this rate to the Wuhan and Hubei population-based estimations,  
109 cumulative numbers of COVID-19 cases among Wuhan's Japanese residents of were  
110 estimated as 25 [16, 33] and 25 [20, 29] on Feb 8 and as 34 [22, 46] and 34 [28, 40]  
111 on Feb 15, respectively, if the evacuation had not been carried out. As of Feb 1, there  
112 were 11 diagnosed cases among the evacuees, so a 1-week delay in the evacuation is  
113 estimated to lead to 14 additional cases and a 2-week delay to 23 additional cases. The  
114 details of estimated number of cases among Wuhan's Japanese residents are shown in  
115 the right panel of Figure 2.

116

117 (Figure 2)

118

### 119 **Sensitivity analysis**

120 We conducted sensitivity analyses for fixed parameters to reflect uncertainty. The mean  
121 values always stayed within 30 to 40 cases and details are shown in Appendix.

122

### 123 **Discussion**

124 To our knowledge, this is the first study to investigate the effect of evacuation by  
125 aircraft as a countermeasure against an emerging infectious disease outbreak. Our  
126 results showed that evacuation by aircraft can contribute substantially in the short term  
127 to reducing the total cumulative number of patients.

128         One of the strengths of this study is that we could use all test results from the  
129 evacuees, including actual prevalence. It is noteworthy that six of 11 PCR-positive cases  
130 were asymptomatic. Furthermore, most of these 11 cases had no obvious contact history  
131 with patients with COVID-19 or influenza-like illness. These characteristics are  
132 compatible with the long duration of comparatively mild illnesses and a large number of  
133 unreported cases [5, 7, 8, 14–19]. Given this information, we modified the existing  
134 SEIR model to a SEMAIR model in order to reflect the characteristics of COVID-19.



135           In conclusion, evacuation by aircraft might be an effective countermeasure  
136 against an emerging infectious disease outbreak. However, further investigation is  
137 needed to assess the impact of this countermeasure more precisely.

138

### 139 **Limitations**

140 We recognise several limitations of our analysis. First, we assumed homogeneity  
141 between Wuhan’s Japanese and Chinese residents, but presumably the two populations  
142 have some differences in lifestyle and behaviour and if that is the case, frequency of  
143 effective contact would be different. A previous study showed that Japanese have more  
144 frequent social contact than people in European countries [20, 21], but there is no  
145 evidence on social contact in China in the literature. Accordingly, both overestimation  
146 and underestimation should be considered when interpreting our results. Second, we  
147 fixed some of the parameters in accordance with a previous modelling study. Because  
148 these parameter values vary due to each model’s assumption, it is not clear whether  
149 fixed parameter values appropriately reflect reality or not. Nevertheless, the results of  
150 the sensitivity analyses indicate the validity of our analyses. Third, it is difficult to  
151 assess true “effectiveness” of evacuation as a countermeasure against a COVID-19  
152 outbreak. While the number of cases averted by the intervention can be estimated, the

153 impact of the intervention on public health is still not apparent. In addition, the Japanese  
154 government restricted the movement of evacuees after their check-up at National Center  
155 for Global Health and Medicine (NCGM), and this is thought to have prevented the  
156 spread of COVID-19 inside Japan. Restriction of movement is another effect of  
157 evacuation, but our estimation did not take it into consideration. This might be another  
158 topic appropriate for modelling studies in the future.

159

160

161

162 **Abbreviations**

163 COVID-19: coronavirus disease 2019; MHLW: Ministry of Health, Labour and Welfare

164 Japan; WHO: World Health Organization; NCGM: National Center for Global Health

165 and Medicine, Tokyo, Japan; SEMAIR:

166 susceptible-exposed-moderate-asymptomatic-infectious-recovered; SEIR:

167 susceptible-exposed-infectious-recovered; CI: confidence interval.

168

169

170 **Declarations**

171 **Ethics approval and consent to participate**

172 This study was approved by the Ethics Committee of National Center for Global Health

173 and Medicine, Tokyo, Japan (Approval Number NCGM-G-003475-00).

174

175 **Consent for publication**

176 Not applicable.

177

178 **Availability of data and materials**

179 The datasets used and/or analysed during the current study are available from the  
180 corresponding author on reasonable request.

181

## 182 **Competing interests**

183 We declare no competing interests.

184

## 185 **Funding**

186 No funder supported this study.

187

## 188 **Authors' contributions**

189 ST and YA conceived the study. YA and ST constructed the model and ran simulations.

190 ST drafted the first manuscript and YA modified it. SK, KH and ST collected a part of

191 data used in this study. SK, KH, and NO critically reviewed the manuscript and all

192 authors approved the final version of the manuscript.

193

## 194 **Acknowledgments**

195 Not applicable.

196

197

## References

198

199 1. Zhu N, Zhang D, Wang W, Li X, Yang B, Song J, et al. A Novel Coronavirus from  
200 Patients with Pneumonia in China, 2019. *New England Journal of Medicine*.  
201 2020;0:null.

202 2. World Health Organization. Novel Coronavirus (2019-nCoV) situation reports.  
203 <https://www.who.int/emergencies/diseases/novel-coronavirus-2019/situation-reports>.  
204 Accessed 4 Feb 2020.

205 3. Shimazu S. Nikkei Business Online (in Japanese). Returnee from Wuhan city by the  
206 chartered flights were “not isolated.”  
207 <https://business.nikkei.com/atcl/gen/19/00002/012801051/>. Accessed 4 Feb 2020.

208 4. Wu P, Hao X, Lau EHY, Wong JY, Leung KSM, Wu JT, et al. Real-time tentative  
209 assessment of the epidemiological characteristics of novel coronavirus infections in  
210 Wuhan, China, as at 22 January 2020. *Eurosurveillance*. 2020;25:2000044.

211 5. Tian S, Hu N, Lou J, Chen K, Kang X, Xiang Z, et al. Characteristics of COVID-19  
212 infection in Beijing. *Journal of Infection*. 2020. doi:10.1016/j.jinf.2020.02.018.

213 6. Tong Z-D, Tang A, Li K-F, Li P, Wang H-L, Yi J-P, et al. Potential Presymptomatic  
214 Transmission of SARS-CoV-2, Zhejiang Province, China, 2020. *Emerging Infect Dis*.  
215 2020;26.

216 7. Bai Y, Yao L, Wei T, Tian F, Jin D-Y, Chen L, et al. Presumed Asymptomatic Carrier  
217 Transmission of COVID-19. *JAMA*. 2020. doi:10.1001/jama.2020.2565.

218 8. Guan W, Ni Z, Hu Y, Liang W, Ou C, He J, et al. Clinical Characteristics of  
219 Coronavirus Disease 2019 in China. *New England Journal of Medicine*. 2020;0:null.

220 9. Kam K, Yung CF, Cui L, Lin Tzer Pin R, Mak TM, Maiwald M, et al. A Well Infant  
221 with Coronavirus Disease 2019 (COVID-19) with High Viral Load. *Clin Infect Dis*.  
222 doi:10.1093/cid/ciaa201.

223 10. Kermack WO, McKendrick AG. Contributions to the mathematical theory of  
224 epidemics—I. *Bulletin of mathematical biology*. 1991;53:33–55.

- 225 11. Hethcote HW. The Mathematics of Infectious Diseases. SIAM Review.  
226 2000;42:599–653.
- 227 12. Huang C, Wang Y, Li X, Ren L, Zhao J, Hu Y, et al. Clinical features of patients  
228 infected with 2019 novel coronavirus in Wuhan, China. The Lancet. 2020;0.  
229 doi:10.1016/S0140-6736(20)30183-5.
- 230 13. Yu P, Zhu J, Zhang Z, Han Y, Huang L. A familial cluster of infection associated  
231 with the 2019 novel coronavirus indicating potential person-to-person transmission  
232 during the incubation period. J Infect Dis. 2020.
- 233 14. Wang W, Tang J, Wei F. Updated understanding of the outbreak of 2019 novel  
234 coronavirus (2019-nCoV) in Wuhan, China. J Med Virol. 2020;92:441–7.
- 235 15. Li Q, Guan X, Wu P, Wang X, Zhou L, Tong Y, et al. Early Transmission Dynamics  
236 in Wuhan, China, of Novel Coronavirus–Infected Pneumonia. New England Journal of  
237 Medicine. 2020;0:null.
- 238 16. Riou J, Althaus CL. Pattern of early human-to-human transmission of Wuhan 2019  
239 novel coronavirus (2019-nCoV), December 2019 to January 2020. Eurosurveillance.  
240 2020;25:2000058.
- 241 17. Chen N, Zhou M, Dong X, Qu J, Gong F, Han Y, et al. Epidemiological and clinical  
242 characteristics of 99 cases of 2019 novel coronavirus pneumonia in Wuhan, China: a  
243 descriptive study. The Lancet. 2020;0. doi:10.1016/S0140-6736(20)30211-7.
- 244 18. Hayakawa K, Kutsuna S, Kawamata T, Sugiki Y, Nonaka C, Tanaka K, et al.  
245 SARS-CoV-2 infection among returnees on charter flights to Japan from Hubei, China:  
246 a report from National Center for Global Health and Medicine. Global Health &  
247 Medicine. 2020;2:107–11.
- 248 19. Cheng H-Y, Jian S-W, Liu D-P, Ng T-C, Huang W-T, Lin H-H. Contact Tracing  
249 Assessment of COVID-19 Transmission Dynamics in Taiwan and Risk at Different  
250 Exposure Periods Before and After Symptom Onset. JAMA Intern Med. 2020.  
251 doi:10.1001/jamainternmed.2020.2020.
- 252 20. Mossong J, Hens N, Jit M, Beutels P, Auranen K, Mikolajczyk R, et al. Social  
253 contacts and mixing patterns relevant to the spread of infectious diseases. PLoS  
254 medicine. 2008;5:e74.

255 21. Ibuka Y, Ohkusa Y, Sugawara T, Chapman GB, Yamin D, Atkins KE, et al. Social  
256 contacts, vaccination decisions and influenza in Japan. *J Epidemiol Community Health*.  
257 2016;70:162–7.

258

259

260 **Figure legends**

261

262 **Figure 1. Model structure**

263 White boxes show each compartment S (Susceptible), E (Exposed), M (Moderate), A  
264 (Asymptomatic), I (Infected), and R (Recovered) and arrows represent movement of  
265 each individual.

266

267 **Figure 2. Total number of COVID-19 patients estimated by the SEMAIR model**  
268 **and estimated cumulative number of Japanese cases in Wuhan if the evacuations**  
269 **had not been carried out**

270 The four left small panels show the number of patients estimated by the SEMAIR  
271 model.

272 The left two panels show the estimation of cumulative number of confirmed cases and  
273 number of individuals in each compartment based on the Wuhan population.

274 The right two panels show the estimation of cumulative number of confirmed cases and  
275 number of individuals in each compartment based on the Hubei Province population.

276 Bar plots on the upper panels show the reported number of confirmed cases and dots  
277 and triangles show the estimation by spline method and SEMAIR model, respectively.



278 Blue triangles and brown dots on the lower panels represent the estimated number of  
279 reported cases and the total number of cases (reported and unreported), respectively.  
280 Pink dots and the shaded region represent the 95% confidence intervals.  
281 The right large panel shows expected cumulative number of Japanese cases in Wuhan.  
282 Green square represents the observed number of Japanese patients on Feb 1. The shaded  
283 region represents the 95% confidence intervals.  
284  
285

286 **Table 1. Values of parameters estimated in SEMAIR model for the Wuhan and**  
 287 **Hubei population**

|            | Transmission<br>rate: $\beta^*$ | Transition rate<br>from $M$ to $I$ :<br>$\delta$ | Growth rate<br>of logistic<br>curve: $k$ | Time when<br>$a(t) = 1/2$ :<br>$D$ | Coefficient of<br>infectiousness for<br>$M$ and $A$ : $p$ |
|------------|---------------------------------|--------------------------------------------------|------------------------------------------|------------------------------------|-----------------------------------------------------------|
| Wuhan      | 3.11                            | 0.046                                            | 0.34                                     | 13.38                              | 0.73                                                      |
| population | [3.00,<br>3.22]                 | [0.029,<br>0.063]                                | [0.32,<br>0.35]                          | [12.77,<br>13.99]                  | [0.63,<br>0.82]                                           |
| Hubei      | 3.10                            | 0.047                                            | 0.34                                     | 13.40                              | 0.72                                                      |
| population | [3.09,<br>3.11]                 | [0.038,<br>0.056]                                | [0.33,<br>0.35]                          | [13.40,<br>14.41]                  | [0.68,<br>0.76]                                           |

288

289

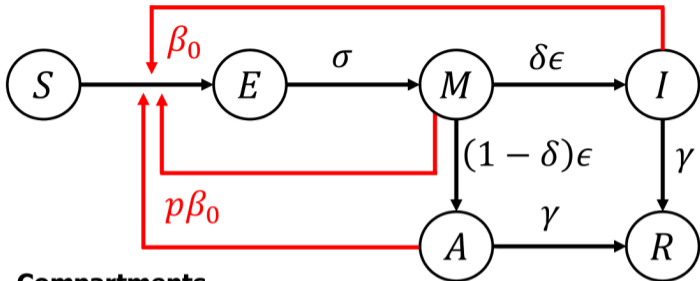

### Compartments

$S$ : Susceptible

$A$ : Asymptomatic

$E$ : Exposed

$I$ : Infected

$M$ : Moderate

$R$ : Recovered

### Parameters

$\beta_0$ : Transmission rate

$\sigma$ : Duration of incubation period

$\gamma$ : Recovery rate

$p$ : Coefficient of infectiousness

$\epsilon$ : Duration of mild illness

$\delta$ : Transition rate

Cumulative number of confirmed cases in Hubei ( $\times 10^4$ )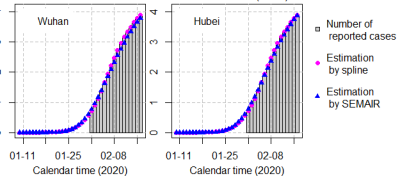Cumulative number of cases in Hubei ( $\times 10^6$ )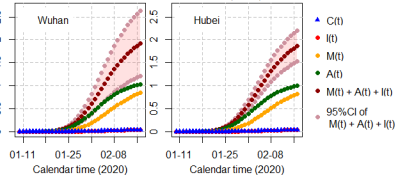

Estimated number of cases

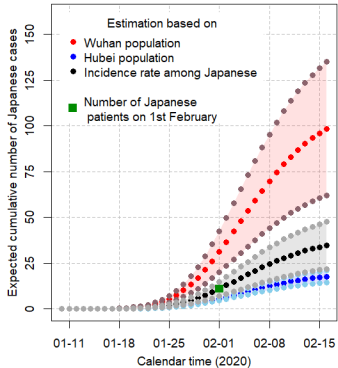

Source: https://medrxiv.org/content/10.1101/2020.06.17.20133520v1.full.pdf
